# Supplementary material for: Cerium Oxide Nanoparticles Rescue α-Synuclein-Induced Toxicity in a Yeast Model of Parkinson’s Disease
Source: MDPI journal article supplement (doi:10.3390/nano10020235), 2020-01-29
Supplement: s1 [file s1]

## Supplementary Materials

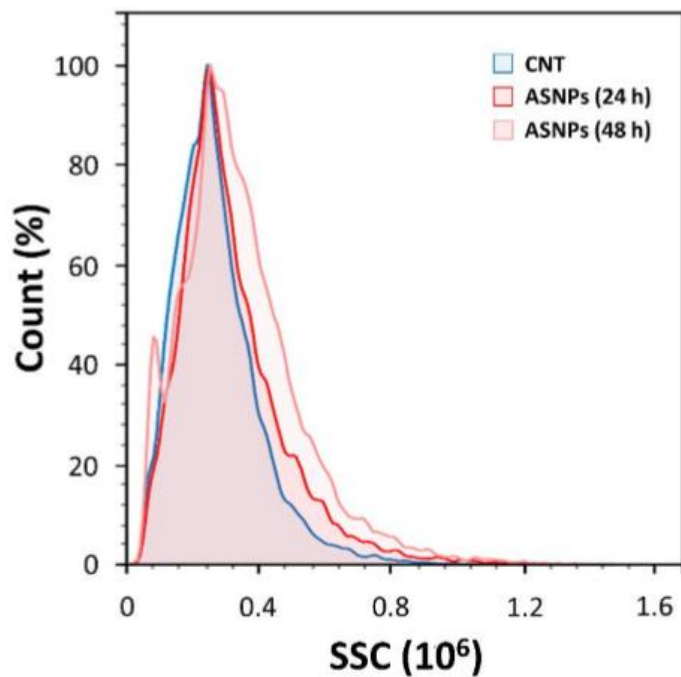

**Figure S1.** Flow cytometry analysis of  $\alpha$ -syn-expressing cells exposed to ASNPs.  $\alpha$ -Syn-expressing cells (HiTox strain) were grown on SGal medium with or without ASNPs (100 ng/ $\mu$ L) for different times of incubation (24–48 h) prior to flow cytometry analysis. A time-dependent increase of SSC signals was observed in ASNP-treated cells compared with control (untreated; CNT) cells, indicating that these NPs were internalized in yeast cells, but probably to a lesser extent than CeO<sub>2</sub> NPs (see, for comparison, Figure 2b).
